# Supplementary material for: Mutual Augmentation of Spectral Sensing and Machine Learning for Non-Invasive Detection of Apple Fruit Damages
Source: MDPI journal article supplement (doi:10.3390/horticulturae8121111), 2022-11-26
Supplement: s1 [file s1]

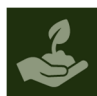

*Online supplementary to the paper*

# Mutual Augmentation of Spectral Sensing and Machine Learning for Non-Invasive Detection of Apple Fruit Damages

**Boris Shurygin <sup>1,2,\*</sup>, Igor Smirnov <sup>3</sup>, Andrey Chilikin <sup>3</sup>, Dmitry Khort <sup>3</sup>, Alexey Kutyrev <sup>3</sup>, Svetlana Zhukovskaya <sup>4</sup> and Alexei Solovchenko <sup>1,2,3,\*</sup>**

<sup>1</sup> Faculty of Biology, Lomonosov Moscow State University, 119234 Moscow, Russia

<sup>2</sup> School “Brain, Cognitive Systems, Artificial Intelligence”, Lomonosov Moscow State University, 119234 Moscow, Russia

<sup>3</sup> Federal Scientific Agroengineering Center VIM, 109428 Moscow, Russia

<sup>4</sup> Michurin Federal Scientific Center, 393766 Michurinsk, Russia

\* Correspondence: lodinn@lodinn.com (B.S.); solovchenkoae@my.msu.ru (A.S.); Tel.: +7-(495)-9392587

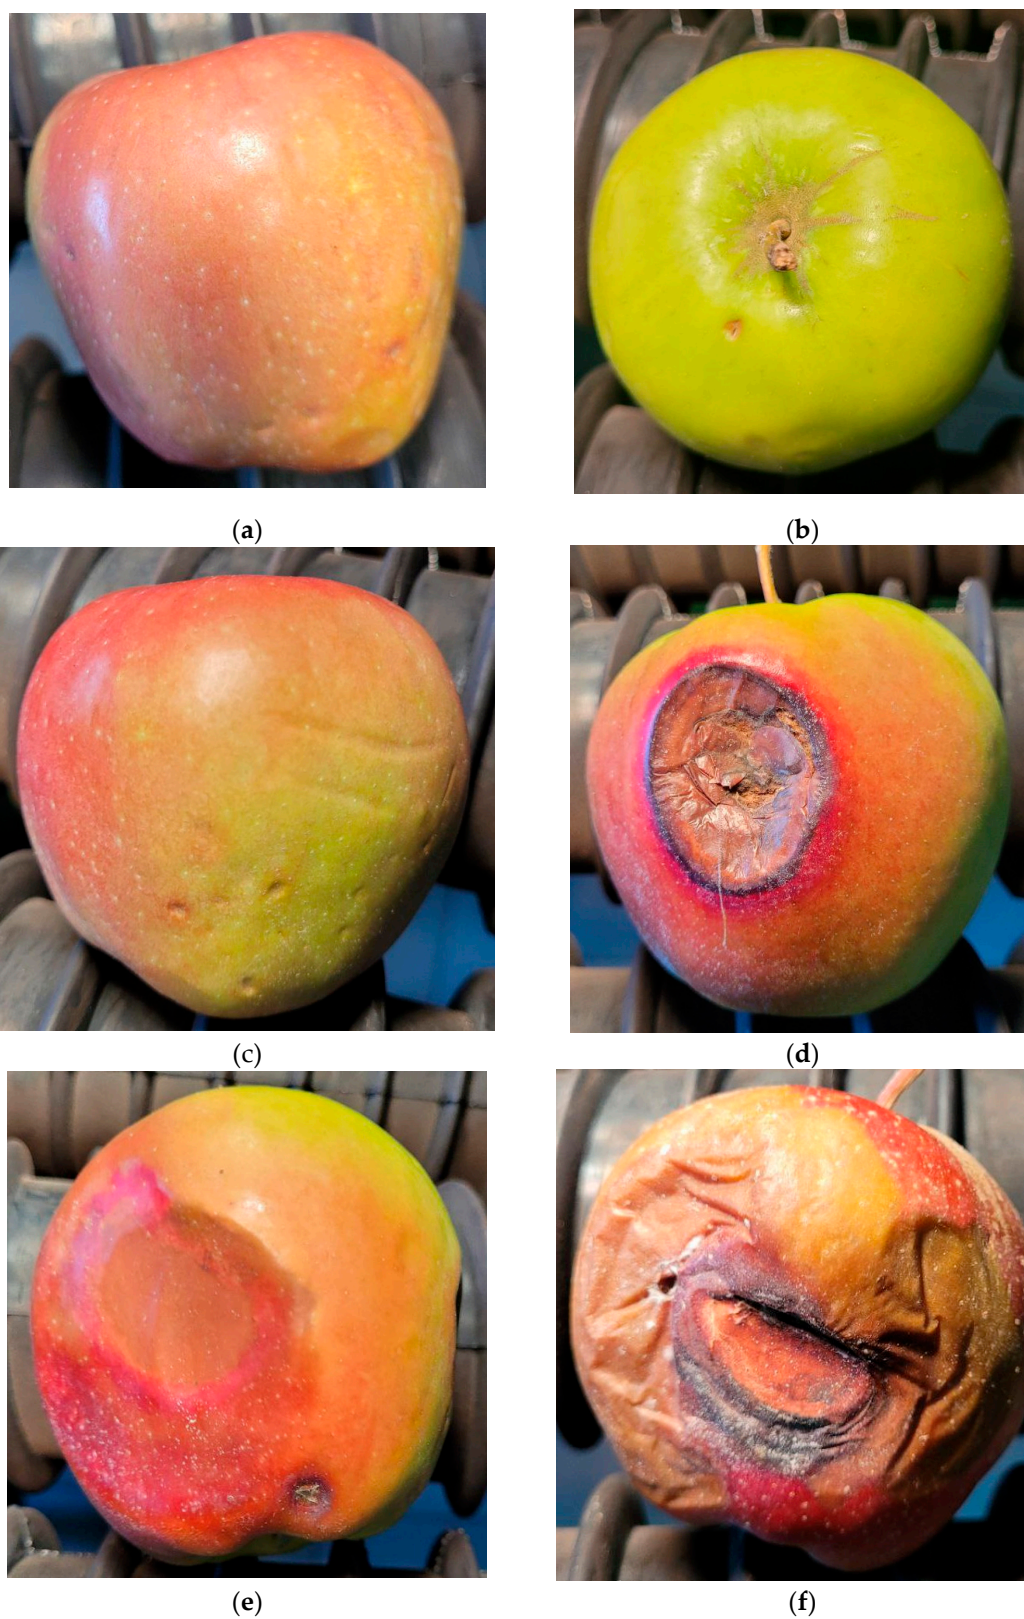

**Figure S1.** Representative photos of the studied apple fruits (conventional RGB images): (a) Healthy red apple; (b) Healthy yellow-green apple; (c) slight mechanical damages; (d) severe sunscald; (e) a heavy bruise; (f) fungal lesion after mechanical damage.



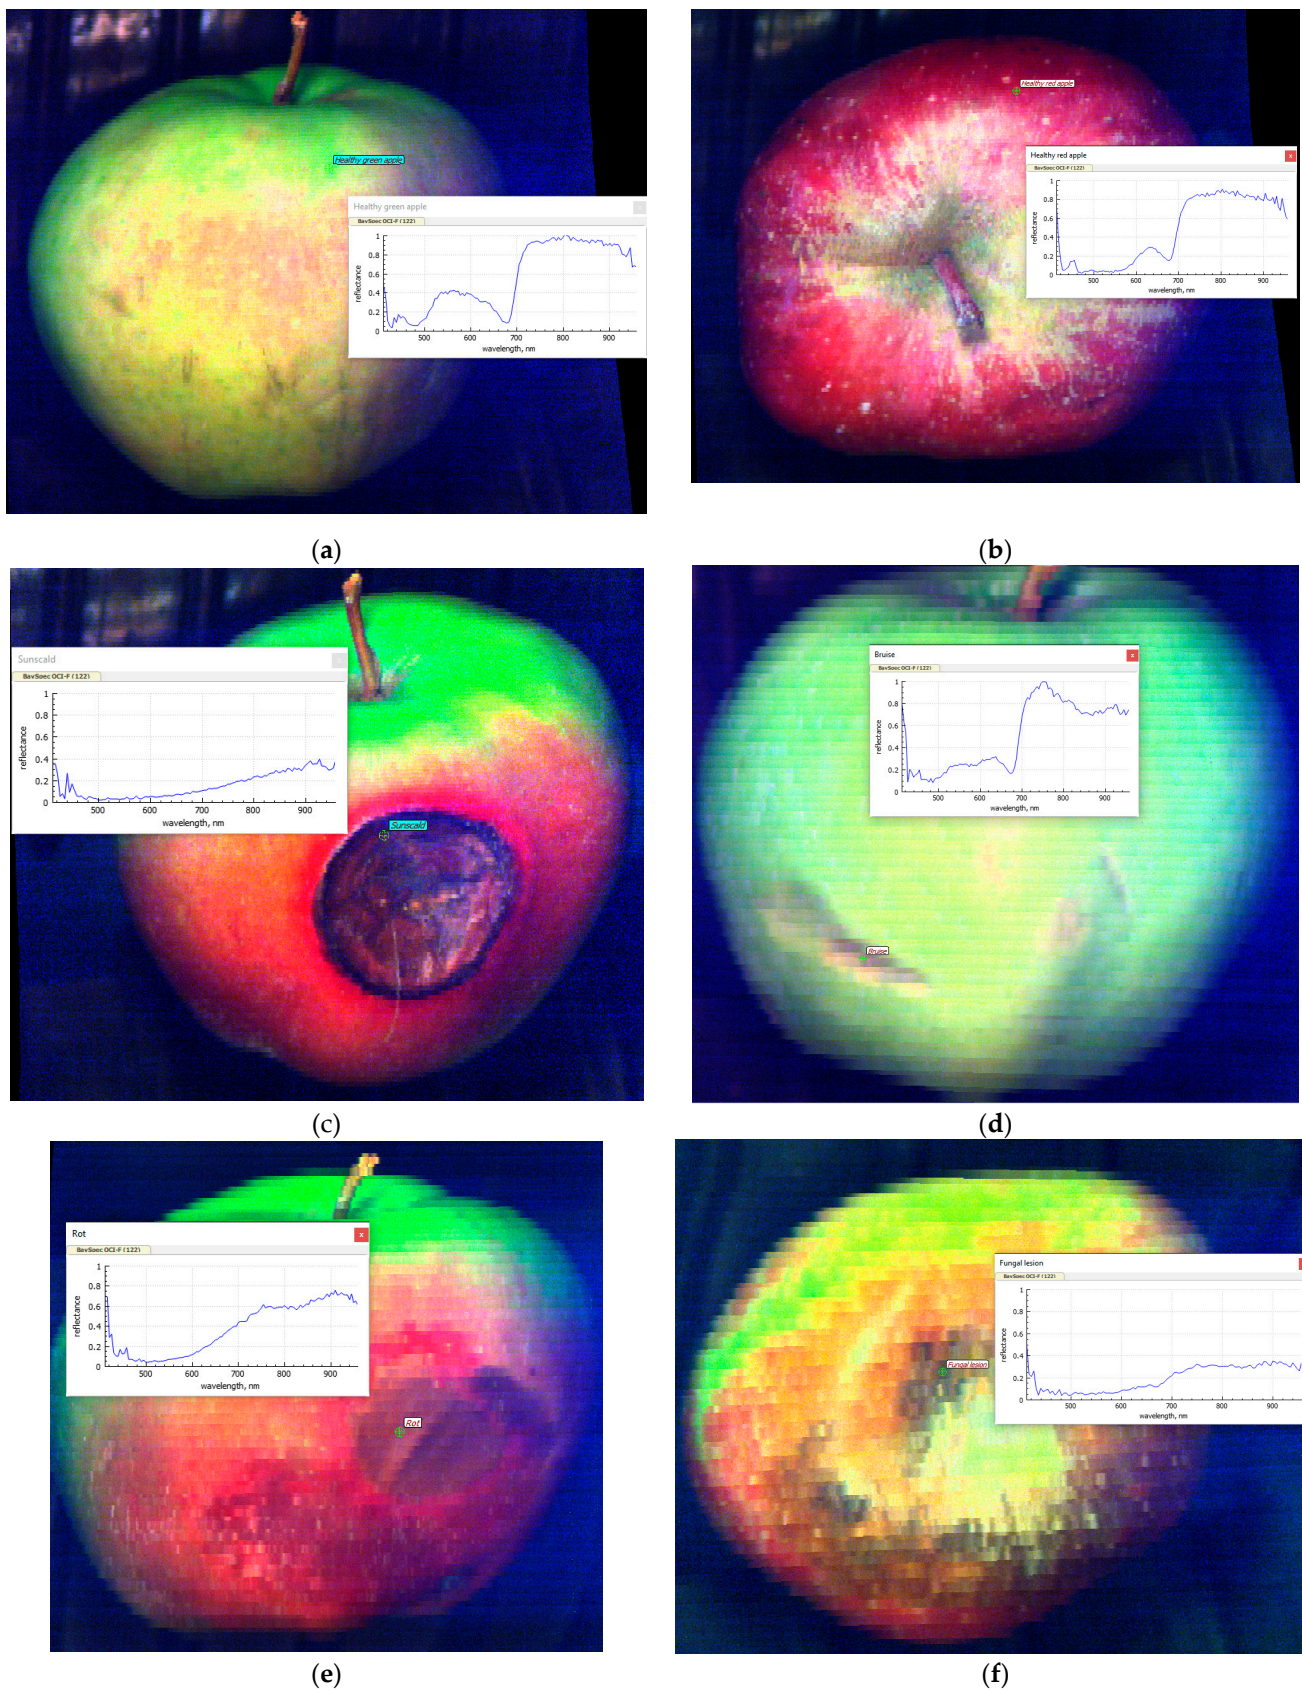

**Figure S2.** Representative RGB images of the studied apple fruits (composed from their hyperspectral images) with a typical reflectance spectrum (shown in overlay) of the damaged area (sampling point is marked on the image): (a) Healthy green-red apple; (b) Healthy red apple; (c) severe sunscald; (d) bruise; (e) rot after mechanical damage; (f) fungal lesion.

**Table S1.** Per-pixel classification results, inference on the test set only.

| Feature set used                               |    | Accuracy, %     | Cohen's kappa      | F2 score           |
|------------------------------------------------|----|-----------------|--------------------|--------------------|
| Baseline (agreement between the human experts) |    | 98.4±1.2        | 0.949±0.029        | 0.386±0.353        |
| Reflectances with spectral downsampling        | 1  | 98.8±1.6        | 0.956±0.064        | 0.106±0.232        |
|                                                | 2  | 98.8±1.6        | 0.956±0.065        | 0.104±0.233        |
|                                                | 4  | 98.7±1.6        | 0.956±0.065        | 0.102±0.233        |
|                                                | 8  | 98.7±1.6        | 0.955±0.065        | 0.096±0.229        |
|                                                | 16 | 98.5±1.6        | 0.948±0.065        | 0.063±0.200        |
|                                                | 32 | 98.5±1.5        | 0.946±0.064        | 0.087±0.217        |
| Reflectances with no downsampling + LBP        |    | 98.8±1.6        | 0.956±0.064        | <b>0.142±0.263</b> |
| Reflectances + LBP + weighting                 |    | 96.6±3.2        | 0.896±0.075        | 0.093±0.147        |
| LBP only                                       |    | 91.2±3.4        | 0.667±0.095        | 0.000±0.000        |
| VI only                                        |    | 98.7±1.2        | 0.955±0.048        | 0.122±0.245        |
| VI + LBP                                       |    | <b>98.9±1.4</b> | <b>0.962±0.057</b> | 0.096±0.238        |
| VI + LBP + weighting                           |    | 98.8±1.5        | 0.959±0.061        | 0.090±0.228        |

**Table S2.** Per-pixel classification results using annotations from human expert #2.

| Feature set used                               |    | Accuracy, %     | Cohen's kappa      | F2 score           |
|------------------------------------------------|----|-----------------|--------------------|--------------------|
| Baseline (agreement between the human experts) |    | 98.4±1.2        | 0.949±0.029        | 0.386±0.353        |
| <b>Random Forest classifiers</b>               |    |                 |                    |                    |
| Reflectances with spectral downsampling        | 1  | 97.2±2.7        | 0.917±0.064        | 0.147±0.271        |
|                                                | 2  | 97.2±2.8        | 0.916±0.066        | 0.140±0.267        |
|                                                | 4  | 97.2±2.8        | 0.915±0.066        | 0.137±0.264        |
|                                                | 8  | 97.2±2.9        | 0.914±0.067        | 0.125±0.253        |
|                                                | 16 | 96.9±3.0        | 0.906±0.072        | 0.090±0.212        |
|                                                | 32 | 96.9±3.1        | 0.905±0.072        | 0.112±0.223        |
| Reflectances with no downsampling + LBP        |    | 97.2±2.8        | 0.916±0.066        | 0.158±0.270        |
| Reflectances + LBP + weighting                 |    | 95.4±4.1        | 0.867±0.080        | <b>0.192±0.238</b> |
| LBP only                                       |    | 89.6±4.9        | 0.639±0.100        | 0.000±0.000        |
| VI only                                        |    | 97.1±2.6        | 0.913±0.061        | 0.143±0.256        |
| VI + LBP                                       |    | <b>97.3±2.7</b> | <b>0.921±0.063</b> | 0.164±0.277        |
| VI + LBP + weighting                           |    | <b>97.3±2.6</b> | 0.920±0.062        | 0.174±0.279        |
| <b>Support Vector classifiers</b>              |    |                 |                    |                    |
| Reflectances with spectral downsampling        | 1  | <b>97.0±3.0</b> | 0.909±0.071        | 0.132±0.239        |
|                                                | 2  | 96.9±3.1        | 0.907±0.074        | 0.101±0.210        |
|                                                | 4  | 96.9±3.1        | 0.905±0.074        | 0.088±0.199        |
|                                                | 8  | 96.8±3.2        | 0.904±0.075        | 0.079±0.193        |
|                                                | 16 | 96.6±3.2        | 0.895±0.076        | 0.035±0.128        |
|                                                | 32 | 96.6±3.2        | 0.893±0.077        | 0.019±0.080        |
| Reflectances with no downsampling + LBP        |    | <b>97.0±3.0</b> | <b>0.910±0.070</b> | 0.131±0.237        |

---

|                                   |          |              |                    |
|-----------------------------------|----------|--------------|--------------------|
| Reflectances + LBP +<br>weighting | 94.9±2.5 | 0.843±0.055  | <b>0.203±0.270</b> |
| LBP only                          | 39.1±3.8 | -0.106±0.026 | 0.015±0.021        |
| VI only                           | 96.6±3.2 | 0.896±0.077  | 0.006±0.036        |
| VI + LBP                          | 95.8±3.6 | 0.876±0.080  | 0.029±0.048        |
| VI + LBP + weighting              | 93.8±3.5 | 0.811±0.064  | 0.098±0.129        |

---
